# Supplementary material
Source: PubMed Central journal article supplement (PMC7093820)
Supplement: NIHMS1550604-supplement-supplementary.pdf [file NIHMS1550604-supplement-supplementary.pdf]

# THE LANCET HIV

## Supplementary appendix

This appendix formed part of the original submission and has been peer reviewed. We post it as supplied by the authors.

Supplement to: The Collaborative Initiative for Paediatric HIV Education and Research (CIPHER) Global Cohort Collaboration. Incidence of switching to second-line antiretroviral therapy and associated factors in children with HIV: an international cohort collaboration. *Lancet HIV* 2019; **6**: e105–15.

## APPENDIX

### The CIPHER Global Cohort Collaboration

#### Contributors:

**Project Team:** Intira J Collins¶ (MRC Clinical Trials Unit at University College London, London, UK), Kara Wools-Kaloustian¶ (Indiana University School of Medicine, Indianapolis, Indiana, USA), Ruth Goodall\* (MRC Clinical Trials Unit at University College London, London, UK), Colette Smith\* (UCL Institute of Global Health, London, UK), Elaine Abrams (ICAP-Columbia University Mailman School of Public Health, New York, New York, USA), Suna Balkan (Médecins Sans Frontières, France), Jihane Ben-Farhat (Epicentre, Médecins Sans Frontières, Paris, France), Mary-Ann Davies (University of Cape Town, Cape Town, South Africa), Andrew Edmonds (University of North Carolina at Chapel Hill, Chapel Hill, North Carolina, USA), Valériane Leroy (Inserm (French Institute of Health and Medical Research), Paris, France), Harriet Nuwagaba-Biribonwoha (ICAP-Columbia University Mailman School of Public Health, New York, New York, USA), Kunjal Patel (Harvard T. H. Chan School of Public Health, Boston, Massachusetts, USA), Mary E. Paul (Baylor International Pediatric AIDS Initiative, Texas Children's Hospital-USA, Houston, Texas, USA), Jorge Pinto (School of Medicine, Federal University of Minas Gerais, Belo Horizonte, Brazil), Pablo Rojo (Hospital Doce de Octubre, Madrid, Spain), Annette Sohn (Treat Asia/amfAR, Bangkok, Thailand), Russell Van Dyke (Tulane University, New Orleans, Louisiana, USA), Rachel Vreeman (Indiana University School of Medicine, Indianapolis, Indiana, USA).

¶Corresponding authors and contributed equally as project co-chairs. \* Statisticians.

**Data Coordinating Team:** Nicky Maxwell (University of Cape Town, Cape Town, South Africa), Venessa Timmerman (University of Cape Town, Cape Town, South Africa), Charlotte Duff (MRC Clinical Trials Unit at University College London, London, UK),

**Writing Committee:** Ali Judd (MRC Clinical Trials Unit at University College London, London, UK), George Seage III (Harvard T. H. Chan School of Public Health, Boston, Massachusetts, USA), Paige Williams (Harvard T. H. Chan School of Public Health, Boston, Massachusetts, USA), Diana Gibb (MRC Clinical Trials Unit at University College London, London, UK), Linda-Gail Bekker (Desmond Tutu HIV Centre, University of Cape Town, Cape Town, South Africa), Lynne Mofenson (Elizabeth Glaser Pediatric AIDS Foundation, Washington D.C., USA), Marissa Vicari (International AIDS Society, Geneva, Switzerland), Shaffiq Essajee (UNICEF, New York, New York, USA), Edith Q. Mohapi (Baylor International Pediatric AIDS Initiative, Maseru, Lesotho), Peter N. Kazembe (Baylor International Pediatric AIDS Initiative, Lilongwe, Malawi), Makhosazana Hlatshwayo (Baylor International Pediatric AIDS Initiative, Mbabane, Swaziland), Mwita Lumumba (Baylor International Pediatric AIDS Initiative, Mbeya, Tanzania), Adeodata Kekitiinwa-Rukyalekere (Baylor International Pediatric AIDS Initiative, Kampala, Uganda), Sebastian Wanless (Baylor International Pediatric AIDS Initiative, Texas Children's Hospital-USA, Houston, Texas, USA), Mogomotsi S. Matshaba (Baylor International Pediatric AIDS Initiative, Gaborone, Botswana), Tessa Goetghebuer (Hospital St Pierre Cohort, Bruxelles, Belgium), Luisa Galli (Università degli Studi di Firenze, Firenz, Italy), Sybil Geelen (Wilhelmina Children's Hospital, University Medical Centre Utrecht, University of Utrecht, Utrecht, the Netherlands), Claire Thorne (UCL Great Ormond Street Institute of Child Health, University College London, London, UK), Josiane Warszawski (Inserm (French Institute of Health and Medical Research), Paris, France), Carlo Giaquinto (PENTA Foundation, Padova, Italy), Magdalena Marczyńska (Medical University of Warsaw, Hospital of Infectious Diseases in Warsaw, Warsaw, Poland), Laura Marques (Portugal Centro Hospitalar do Porto, Porto,

CIPHER Incidence of switch to second-line ART Supplementary Tables and Figures (Lancet HIV)

Portugal), Filipa Prata (Hospital de Santa Maria, Lisbon, Portugal), Luminita Ene (Victor Babes Hospital, Bucharest, Romania), Liubov Okhonskaia (Republican Hospital of Infectious Diseases, St Petersburg, Russian Federation), Antoni Noguera-Julian (Hospital Sant Joan de Déu, Universitat de Barcelona, Barcelona, Spain), Lars Naver (Karolinska University Hospital, Stockholm, Sweden), Christoph Rudin (University Children's Hospital, Basel, Switzerland), Gonzague Jourdain (Faculty of Associated Medical Sciences, Chiang Mai University, Chiang Mai, Thailand/ Institut de Recherche pour le Développement, Marseille, France), Alla Volokha (Shupyk National Medical Academy of Postgraduate Education, Kiev, Ukraine), Vanessa Rouzier (GHESKIO Center, Port-au-Prince, Haiti), Regina Succi (Universidade Federal de São Paulo, São Paulo, Brazil), Kulkanya Chokephaibulkit (Siriraj Hospital, Mahidol University, Bangkok, Thailand), Azar Kariminia (Kirby Institute, University of New South Wales, Sydney, Australia), Marcel Yotebieng (College of Public Health, Ohio State University, Columbus, Ohio, USA), Patricia Lelo (Pediatric Hospital Kalembe Lembe, Lingwala, Kinshasa, Democratic Republic of Congo), Rita Lyamuya (Morogoro Regional Hospital, Morogoro, Tanzania), Irene Marete (Academic Model Providing Access to Healthcare (AMPATH), Eldoret, Kenya), Patrick Oyaró (Family AIDS Care and Education Services (FACES), Kenya Medical Research Institute (KEMRI), Kisumu, Kenya), Andrew Boule (Center for Infectious Disease Epidemiology and Research, University of Cape Town, South Africa/ Khayelitsha ART Programme, Cape Town, South Africa/ Western Cape Department of Health, Cape Town, South Africa), Kennedy Malisita (Queen Elisabeth Central Hospital, Blantyre, Malawi), Geoffrey Fatti (Kheth'Impilo, Cape Town, South Africa/ Faculty of Medicine and Health Sciences, Stellenbosch University, South Africa), Andreas D. Haas (Institute of Social and Preventive Medicine, University of Bern, Switzerland), Sophie Desmonde (Inserm (French Institute of Health and Medical Research), Paris, France), Fatoumata Dicko (CHU Gabriel Touré, Bamako, Mali), Mark J. Abzug (University of Colorado School of Medicine and Children's Hospital Colorado, Aurora, Colorado, USA), Myron Levin (University of Colorado School of Medicine and Children's Hospital Colorado, Aurora, Colorado, USA), James Oleske (Rutgers New Jersey Medical School, Newark, New Jersey, USA), Miriam Chernoff (Harvard T. H. Chan School of Public Health, Boston, Massachusetts, USA), Shirley Traite (Harvard T. H. Chan School of Public Health, Boston, Massachusetts, USA), Murli Purswani (Bronx-Lebanon Hospital Center, Bronx, New York, USA), Chloe Teasdale (ICAP-Columbia University Mailman School of Public Health, New York, New York, USA), Ellen Chadwick (Feinberg School of Medicine, Northwestern University, USA)

**Individual networks contributing to the CIPHER Cohort Collaboration have received the following financial support:**

CCASAnet receives funding from the United States (US) National Institutes of Health (NIH) (U01AI069923); leDEA Asia Pacific receives funding from the US NIH (U01AI069907); leDEA Central Africa receives funding from the US NIH (U01AI096299-07); leDEA East Africa receives funding from the US NIH (U01-AI069911); leDEA Southern Africa receives funding from the US NIH (U01-AI069924); leDEA West Africa receives funding from the US NIH (U01AI069919); IMPAACT 219C and P1074 (The International Maternal Pediatric Adolescent AIDS Clinical Trials Network (IMPAACT) was supported by NIAID under Award Numbers UM1AI068632 (IMPAACT LOC), UM1AI068616 (IMPAACT SDMC) and UM1AI106716 (IMPAACT LC), with co-funding from NICHD and NIMH.) PHACS receives funding from the US NIH (U01 HD052102 and US NIH U01 HD052104); The Optimal Models (ICAP at Columbia University) project was supported by the President's Emergency Plan for AIDS Relief (PEPFAR) through the Centers for Disease Control and Prevention under the terms of Cooperative Agreement Number 5U62PS223540 and 5U2GPS001537. EPPICC receives funding from EuroCoord (no260694),

PENTA Foundation and was partly funded by the Medical Research Council (<https://www.mrc.ac.uk>), programme number MC\_UU\_12023/26. Individual cohorts contributing to EPPICC receive the following support: The ATHENA database is maintained by Stichting HIV Monitoring and supported by a grant from the Dutch Ministry of Health, Welfare and Sport through the Centre for Infectious Disease Control of the National Institute for Public Health and the Environment. CoRISPE-cat receives financial support from the Instituto de Salud Carlos III through the Red Temática de Investigación Cooperativa en Sida. CoRISPE-s and Madrid Cohort is partially funded by the Fundación para la Investigación y Prevención de SIDA en España (FIPSE) (FIPSE 3608229/09 , FIPSE 240800/09, FIPSE 361910/10), Red Temática de Investigación en SIDA (RED RIS) supported by Instituto de Salud Carlos III (ISCIII) (RD12/0017/0035 and RD12/0017/0037), project as part of the Plan R+D+I and co financed by ISCIII- Subdirección General de Evaluación and Fondo Europeo de Desarrollo Regional (FEDER), Mutua Madrileña 2012/0077, Gilead Fellowship 2013/0071, FIS PI15/00694 ,CoRISpe (RED RIS RD06/0006/0035 yRD06/0006/0021). The Swiss HIV Cohort Study is supported by the Swiss National Science Foundation (grant #148522), and by the SHCS research foundation. Ukraine Paediatric HIV Cohort is supported by the PENTA Foundation. CHIPS is funded by the NHS (London Specialised Commissioning Group and has received additional support from Bristol-Myers Squibb, Boehringer Ingelheim, GlaxoSmithKline, Roche, Abbott and Gilead Sciences. The MRC Clinical Trials Unit at UCL is supported by the Medical Research Council programme number MC\_UU\_12023/26.

#### **ACKNOWLEDGEMENTS:**

**The following clinics, their personnel and patients are acknowledged for their contribution to the participating networks that made the CIPHER Cohort Collaboration Time on First Line Project possible.**

**BIPAI:** Baylor Botswana, Gabriel Anabwani; Baylor Lesotho, Edith Mohapi; Baylor Malawi, Peter N. Kazembe; Baylor Swaziland, Makhosazana Hlatshwayo; Baylor Tanzania, Mwita Lumumba; Baylor Uganda, Adeodata Kekitiinwa-Rukyalekere. Baylor International Pediatric AIDS Initiative at Texas Children's Hospital Founder, Mark Kline.

**EPPICC:** *Belgium* - Hospital St Pierre Cohort, Brussels: Tessa Goetghebuer, MD, PhD; Marc Hainaut, MD PhD; Evelyne Van der Kelen, research nurse; Marc Delforge, data manager. *France* - French Perinatal Cohort Study/Enquête Périnatale Française, ANRS EPF-CO10. Coordinating center, INSERM U1018, team 4: Dr Josiane Warszawski MD, PhD, Jerome Le Chenadec, Elisa Arezes, Olivia Dialla, Thierry Wack, Corine Laurent, Lamya Ait si Selmi, Isabelle Leymarie, Fazia Ait Benali, Maud Brossard, Leila Boufassa. Hôpital Louis Mourier, Colombes, Dr Corinne Floch-Tudal; Groupe Hospitalier Cochin Tarnier Port-Royal, Paris, Dr Ghislaine Firtion; Centre Hospitalier Intercommunal, Creteil, Dr Isabelle Hau; Centre Hospitalier Général, Villeneuve Saint Georges, Dr Anne Chace; Centre Hospitalier Général- Hôpital Delafontaine, Saint-Denis, Dr Pascal Bolot; Groupe Hospitalier Necker, Paris, Pr Stéphane Blanche; Centre hospitalier Francilien Sud, Corbeil Essonne, Dr Michèle Granier; Hôpital Antoine Béclère, Clamart, Pr Philippe Labrune; Hôpital Jean Verdier, Bondy, Dr Eric Lachassine; Hôpital Trousseau, Paris, Dr Catherine Dollfus ; Hôpital Robert Debré, Paris, Dr Martine Levine; Hôpital Bicêtre, Le Kremlin Bicêtre, Dr Corinne Fourcade; Centre Hospitalier Intercommunal, Montreuil, Dr Brigitte Heller- Roussin; Centre Hospitalier Pellegrin, Bordeaux,

Dr Camille Runel-Belliard; CHU Paule de Viguier, Toulouse, Dr Joëlle Tricoire; CHU Hôpital de l'Archet II, Nice, Dr Fabrice Monpoux; Groupe Hospitalier de la Timone, Marseille; CHU Hôpital Jean Minjot, Besançon, Dr Catherine Chirouze; CHU Nantes Hotel Dieu, Nantes, Dr Véronique Reliquet; CHU Caen, Caen, Pr Jacques Brouard; Institut d'Hématologie et Oncologie Pédiatrique, Lyon, Dr Kamila Kebaili; CHU Angers, Angers, Dr Pascale Fialaire; CHR Arnaud de Villeneuve, Montpellier, Dr Muriel Lalande; CHR Jeanne de Flandres, Lille, Dr Françoise Mazingue; Hôpital Civil, Strasbourg, Dr Maria Luisa Partisani. *Germany* - German Paediatric & Adolescent HIV Cohort (GEPIC): Dr Christoph Königs, Dr Stephan Schultze-Strasser. German clinical centers: Hannover Medical School, Dr. U. Baumann; Pediatric Hospital Krefeld, Dr. T. Niehues; University Hospital Düsseldorf, Dr. J. Neubert; University Hospital Hamburg, Dr. R. Kobbe; Charite Berlin, Dr. C. Feiterna-Sperling; University Hospital Frankfurt, Dr. C. Königs; University Hospital Mannheim, Dr. B. Buchholz; Munich University Hospital, Dr. G. Notheis. *Greece* - Greek cohort: Vana Spoulou. *Italy* - Italian Register for HIV infection in Children. Coordinators: Maurizio de Martino (Florence), Pier Angelo Tovo (Turin). Participants: Osimani Patrizia (Ancona), Domenico Larovere (Bari), Maurizio Ruggeri (Bergamo), Giacomo Faldella, Francesco Baldi (Bologna) Raffaele Badolato (Brescia), Carlotta Montagnani, Elisabetta Venturini, Catuscia Lisi (Florence), Antonio Di Biagio, Lucia Taramasso (Genoa), Vania Giacommet, Paola Erba, Susanna Esposito, Rita Lipreri, Filippo Salvini, Claudia Tagliabue (Milan), Monica Cellini (Modena), Eugenia Bruzzese, Andrea Lo Vecchio (Naples), Osvalda Rampon, Daniele Donà (Padua), Amelia Romano (Palermo), Icilio Dodi (Parma), Anna Maccabruni (Pavia), Rita Consolini (Pisa), Stefania Bernardi, Hyppolite Tchidjou Kuekou, Orazio Genovese (Rome), Paolina Olmeo (Sassari), Letizia Cristiano (Taranto), Antonio Mazza (Trento), Clara Gabiano, Silvia Garazzino (Turin), Antonio Pellegatta (Varese). *Netherlands* The ATHENA database is maintained by Stichting HIV Monitoring and supported by a grant from the Dutch Ministry of Health, Welfare and Sport through the Centre for Infectious Disease Control of the National Institute for Public Health and the Environment. Clinical Centres (paediatric care): Emma Kinderziekenhuis, Academic Medical Centre of the University of Amsterdam: *HIV treating physicians*: D. Pajkrt, H.J. Scherpbier. *HIV nurse consultants*: C. de Boer, A.M. Weijzenfeld, A. van der Plas. *HIV clinical virologists/chemists*: S. Jurriaans, N.K.T. Back, H.L. Zaaijer, B. Berkhout, M.T.E. Cornelissen, C.J. Schinkel, K.C. Wolthers. Erasmus MC–Sophia, Rotterdam: *HIV treating physicians*: P.L.A. Fraaij, A.M.C. van Rossum, C.L. Vermont. *HIV nurse consultants*: L.C. van der Knaap, E.G. Visser. *HIV clinical virologists/chemists*: C.A.B. Boucher, M.P.G. Koopmans, J.J.A van Kampen, S.D. Pas. Radboudumc, Nijmegen: *HIV treating physicians*: S.S.V. Henriët, M. van de Flier, K. van Aerde. *HIV nurse consultants*: R. Strik-Albers. *HIV clinical virologists/chemists*: J. Rahamat-Langendoen, F.F. Stelma. Universitair Medisch Centrum Groningen, Groningen: *HIV treating physicians*: E.H. Schölvink. *HIV nurse consultants*: H. de Groot-de Jonge. *HIV clinical virologists/chemists*: H.G.M. Niesters, C.C. van Leer-Buter, M. Knoester. Wilhelmina Kinderziekenhuis, UMC Utrecht, Utrecht: *HIV treating physicians*: L.J. Bont, S.P.M. Geelen, T.F.W. Wolfs. *HIV nurse consultants*: N. Nauta. *HIV clinical virologists/chemists*: R. Schuurman, F. Verduyn-Lunel, A.M.J. Wensing. Coordinating Centre: *Director*: P. Reiss. *Deputy director*: S. Zaheri. *Data analysis*: D.O. Bezemer, A.I. van Sighem, C. Smit, F.W.M.N. Wit, T.S. Boender. *Data management and quality control*: M. Hillebregt, A. de Jong, T. Woudstra. *Data monitoring*: D. Bergsma, S. Grivell, A. Jansen, R. Meijering, M. Raethke, T. Rutkens. *Data collection*: L. de Groot, M. van den Akker, Y. Bakker,

M. Bezemer, E. Claessen, A. El Berkaoui, J. Geerlinks, J. Koops, E. Kruijne, C. Lodewijk, R. van der Meer, L. Munjishvili, F. Paling, B. Peeck, C. Ree, R. Regtop, Y. Ruijs, M. Schoorl, A. Timmerman, E. Tuijn, L. Veenenberg, S. van der Vliet, A. Wisse, E.C. Witte. *Patient registration:* B. Tuk. *Poland* - Polish paediatric cohort: Head of the team: Prof Magdalena Marczyńska, MD, PhD. Members of the team: Jolanta Popielska, MD, PhD; Maria Pokorska-Śpiewak, MD, PhD; Agnieszka Ołdakowska, MD, PhD; Konrad Zawadka, MD, PhD; Urszula Coupland, MD, PhD. Administration assistant: Małgorzata Doroba. Affiliation: Medical University of Warsaw, Poland, Department of Children's Infectious Diseases; Hospital of Infectious Diseases in Warsaw, Poland. *Portugal* - Centro Hospitalar do Porto: Laura Marques, Carla Teixeira, Alexandre Fernandes. Portugal: Hospital de Santa Maria/CHLN: Filipa Prata. *Romania* - Victor Babes Hospita, Bucharest: Dr Luminita Ene. *Russia* - Federal State-owned Institution "Republican Clinical Infectious Diseases Hospital" of the Ministry of Health of the Russian Federation, St Petersburg: Liubov Okhonskaia, Evgeny Voronin, Milana Miloenko, Svetlana Labutina. *Spain* - CoRISPE-cat, Catalonia: Hospital Universitari Vall d'Hebron, Barcelona (Pere Soler-Palacín, Maria Antoinette Frick and Santiago Pérez-Hoyos (statistician)), Hospital Universitari del Mar, Barcelona (Antonio Mur, Núria López), Hospital Universitari Germans Trias i Pujol, Badalona (María Méndez), Hospital Universitari Josep Trueta, Girona (Lluís Mayol), Hospital Universitari Arnau de Vilanova, Lleida (Teresa Vallmanya), Hospital Universitari Joan XXIII, Tarragona (Olga Calavia), Consorci Sanitari del Maresme, Mataró (Lourdes García), Hospital General de Granollers (Maite Coll), Corporació Sanitària Parc Taulí, Sabadell (Valentí Pineda), Hospital Universitari Sant Joan, Reus (Neus Rius), Fundació Althaia, Manresa (Núria Rovira), Hospital Son Espases, Mallorca (Joaquín Dueñas) and Hospital Sant Joan de Déu, Esplugues (Clàudia Fortuny, Antoni Noguera-Julian). CoRISPE-S and Madrid cohort: María José Mellado, Luis Escosa, Milagros García Hortelano, Talía Sainz (Hospital La Paz); María Isabel González-Tomé, Pablo Rojo, Daniel Blázquez (Hospital Doce de Octubre, Madrid); José Tomás Ramos (Hospital Clínico San Carlos, Madrid); Luis Prieto, Sara Guillén (Hospital de Getafe); María Luisa Navarro, Jesús Saavedra, Mar Santos, M<sup>a</sup> Angeles Muñoz, Beatriz Ruiz, Carolina Fernandez Mc Phee, Santiago Jimenez de Ory, Susana Alvarez (Hospital Gregorio Marañón); Miguel Ángel Roa (Hospital de Móstoles); José Beceiro (Hospital Príncipe de Asturias, Alcalá de Henares); Jorge Martínez (Hospital Niño Jesús, Madrid); Katie Badillo (Hospital de Torrejón); Miren Apilanez (Hospital de Donostia, San Sebastián); Itziar Pocheville (Hospital de Cruces, Bilbao); Elisa Garrote (Hospital de Basurto, Bilbao); Elena Colino (Hospital Insular Materno Infantil, Las Palmas de Gran Canaria); Jorge Gómez Sirvent (Hospital Virgen de la Candelaria, Santa Cruz de Tenerife); Mónica Garzón, Vicente Román (Hospital de Lanzarote); Abián Montesdeoca, Mercedes Mateo (Complejo Universitario de Canarias, La Laguna-Tenerife), María José Muñoz, Raquel Angulo (Hospital de Poniente, El Ejido); Olaf Neth, Lola Falcón (Hospital Virgen del Rocío, Sevilla); Pedro Terol (Hospital Virgen de la Macarena, Sevilla); Juan Luis Santos (Hospital Virgen de las Nieves, Granada); David Moreno (Hospital Carlos Haya, Málaga); Francisco Lendínez (Hospital de Torrecárdenas, Almería); Ana Grande (Complejo Hospitalario Universitario Infanta Cristina, Badajoz); Francisco José Romero (Complejo Hospitalario de Cáceres); Carlos Pérez (Hospital de Cabueñes, Gijón); Miguel Lillo (Hospital de Albacete); Begoña Losada (Hospital Virgen de la Salud, Toledo); Mercedes Herranz (Hospital Virgen del Camino, Pamplona); Matilde Bustillo, Carmelo Guerrero (Hospital Miguel Servet, Zaragoza); Pilar Collado (Hospital Clínico Lozano Blesa, Zaragoza); José

Antonio Couceiro (Complejo Hospitalario de Pontevedra); Amparo Pérez, Ana Isabel Piqueras, Rafael Bretón, Inmaculada Segarra (Hospital La Fe, Valencia); César Gavilán (Hospital San Juan de Alicante); Enrique Jareño (Hospital Clínico de Valencia); Elena Montesinos (Hospital General de Valencia); Marta Dapena (Hospital de Castellón); Cristina Álvarez (Hospital Marqués de Valdecilla, Santander); Ana Gloria Andrés (Hospital de León); Víctor Marugán, Carlos Ochoa (Hospital de Zamora); Santiago Alfayate, Ana Isabel Menasalvas (Hospital Virgen de la Arrixaca, Murcia); Elisa de Miguel (Complejo Hospitalario San Millán-San Pedro, Logroño) and Paediatric HIV-BioBank integrated in the Spanish AIDS Research Network and collaborating Centers. *Sweden* - Karolinska University Hospital, Stockholm (Lars Naver, Sandra Soeria-Atmadja, Vendela Hagås, Erik Belfrage). *Switzerland* - Members of the Swiss HIV Cohort Study (SHCS) and the Swiss Mother and Child HIV Cohort Study: Aebi-Popp K, Asner S, Aubert V, Battegay M, Baumann M, Bernasconi E, Böni J, Brazzola P, Bucher HC, Calmy A, Cavassini M, Ciuffi A, Duppenhaler A, Dollenmaier G, Egger M, Elzi L, Fehr J, Fellay J, Francini K, Furrer H, Fux CA, Grawe C, Günthard HF (President of the SHCS), Haerry D (deputy of "Positive Council"), Hasse B, Hirsch HH, Hoffmann M, Hösli I, Kahlert C, Kaiser L, Keiser O, Klimkait T, Kovari H, Kouyos RD, Ledergerber B, Martinetti G, Martinez de Tejada B, Metzner KJ, Müller, Nicca D, Paioni P, Pantaleo G, Polli Ch, Posfay-Barbe K, Rauch A, Rudin C (Chairman of the Mother & Child Substudy), Schmid P, Scherrer AU (Head of Data Centre), Speck R, Tarr P, Thanh Lecompte M, Trkola A, Vernazza P, Wagner N, Wandeler G, Weber R, Wyler CA, Yerly S. *Thailand* - Program for HIV Prevention & Treatment (PHPT) Marc Lallemand, Gonzague Jourdain, Sophie Le Coeur S, Nicole Ngo-Giang-Huong. Participating hospitals: Lamphun: Pornpun Wannarit; Phayao Provincial Hospital: Pornchai Techakunakorn; Chiangrai Prachanukroh: Rawiwan Hansudewechakul; Chiang Kham: Vanichaya Wanchaitanawong; Phan: Sookchai Theansavetrakul; Mae Sai: Sirisak Nanta; Prapokklao: Chaiwat Ngampiyaskul; Banglamung: Siriluk Phanomcheong; Chonburi: Suchat Hongsiworn; Rayong: Warit Karnchanamayul; Bhuddasothorn Chacheongsao: Ratchanee Kwanchaipanich; Nakornping: Suparat Kanjanavanit; Somdej Prapinklao: Nareerat Kamonpakorn, Maneeratn Nantarukchaikul; Bhumibol Adulyadej: Prapaisri Layangool, Jutarat Mekmullica; Pranangklaio: Paiboon Luksanapisitkul, Sudarat Watanayothin; Buddhachinaraj: Narong Lertpienthum; Hat Yai: Boonyarat Warachit; Regional Health Promotion Center 6, Khon Kaen: Sansanee Hanpinitsak; Nong Khai: Sathit Potchalongsin; Samutsakhon: Pimpraphai Thanasiri, Sawitree Krikajornkitti; Phaholpolphayuhassena: Pornsawan Attavinijtrakarn; Kalasin: Sakulrat Srirojana; Nakhonpathom: Suthunya Bunjongpak; Samutprakarn: Achara Puangsombat; Mahasarakam: Sathaporn Na-Rajsima; Roi-et: Pornchai Ananpatharachai; Sanpatong: Noppadon Akarathum; Vachira Phuket: Weerasak Lawtongkum; Chiangdao: Prapawan Kheunjan, Thitiporn Suriyaboon, Airada Saipanya. Data management team: Kanchana Than-in-at, Nirattiya Jaisieng, Rapeepan Suaysod, Sanuphong Chailoet, Naritsara Naratee, and Suttipong Kawilapat. *Ukraine* - Paediatric HIV Cohort: Dr T. Kaleeva, Dr Y. Baryshnikova (Odessa Regional Centre for HIV/AIDS), Dr S. Soloha (Donetsk Regional Centre for HIV/AIDS), Dr N. Bashkatova (Mariupol AIDS Center), Dr I. Raus (Kiev City Centre for HIV/AIDS), Dr O. Glutshenko, Dr Z. Ruban (Mykolaiv Regional Centre for HIV/AIDS), Dr N. Prymak (Kryvyi Rih), Dr G. Kiseleva (Simferopol), Dr H. Bailey (UCL, London, UK). UK & Ireland - CHIPS is funded by the NHS (London Specialised Commissioning Group) and has received support from the PENTA Foundation and the Medical Research Council programme grant MC\_UU\_12023/26

awarded to the MRC Clinical Trials Unit. It has also received additional support from Abbott, Bristol-Myers Squibb, Boehringer Ingelheim, Gilead Sciences, GlaxoSmithKline, Janssen, Roche, and ViiV Healthcare. CHIPS Steering Committee: Hermione Lyall, Alasdair Bamford, Karina Butler, Katja Doerholt, Caroline Foster, Nigel Klein, Esse Menson, Katia Prime, Andrew Riordan, Fiona Shackley, Delane Shingadia, Sharon Storey, Gareth Tudor-Williams, Anna Turkova, Steve Welch. MRC Clinical Trials Unit: Intira Jeannie Collins, Claire Cook, Siobhan Crichton, Donna Dobson, Keith Fairbrother, Diana M. Gibb, Lynda Harper, Ali Judd, Marthe Le Prevost, Nadine Van Looy. National Study of HIV in Pregnancy and Childhood, UCL: Helen Peters, Claire Thorne. Participating clinics: Republic of Ireland: Our Lady's Children's Hospital Crumlin, Dublin: K Butler, A Walsh. UK: Birmingham Heartlands Hospital, Birmingham: , L Thrasyvoulou , S Welch; Blackpool Victoria Hospital, Blackpool: N Laycock; Bristol Royal Hospital for Children, Bristol: J Bernatoniene, F Manyika ; Calderdale Royal Hospital, Halifax: G Sharpe; Coventry & Warwickshire University Hospital, Coventry: P Lewis, S Welch; Derbyshire Children's Hospital, Derby: B Subramaniam; Derriford Hospital, Plymouth: L Hutchinson, P Ward; Middlesex: K Sloper; Eastbourne District General Hospital, Eastbourne: K Fidler; Glasgow Royal Hospital for Sick Children, Glasgow: , R Hague, V Price; Great Ormond St Hospital for Children, London: , M Clapson, J Flynn, A Cardoso M Abou-Rayyah , N Klein, D Shingadia; Halliwell Children's Centre, Bolton: P Ainsley-Walker; Harrogate District Hospital, Harrogate: P Tovey; Homerton University Hospital, London: D Gurtin; Huddersfield Royal Infirmary, Huddersfield: JP Garside; James Cook Hospital, Middlesbrough: A Fall; John Radcliffe Hospital, Oxford: S Yeadon , S Segal; King's College Hospital, London: C Ball, S Hawkins; Leeds General Infirmary, Leeds: , M Dowie; Leicester Royal Infirmary, Leicester: S Bandi, E Percival ; Luton and Dunstable Hospital, Luton: M Eisenhut; Handforth; Milton Keynes General Hospital, Milton Keynes: PK Roy; Newcastle General, Newcastle: T Flood, A Pickering; Liebeschuetz; Norfolk & Norwich Hospital, Norwich: C Kavanagh; North Manchester General, Manchester: P McMaster C Murphy; North Middlesex Hospital, London: J Daniels, Y Lees; Northampton General Hospital, Northampton: , F Thompson; Northwick Park Hospital Middlesex; , B Williams; Nottingham QMC , Nottingham: L Cliffe, A Smyth, S Southall; Queen Alexandra Hospital, Portsmouth: H Freeman; Raigmore Hospital, Inverness; Royal Alexandra Hospital, Brighton: K Fidler; Royal Belfast Hospital for Sick Children, Belfast: S Christie; Royal Berkshire Hospital, Reading: A Gordon; Royal Children's Hospital, Aberdeen: D Rogahn; Royal Cornwall Hospital, Truro: S Harris, L Hutchinson; Royal Devon and Exeter Hospital, Exeter: A Collinson, L Hutchinson; Royal Edinburgh Hospital for Sick Children, Edinburgh: L Jones, B Offerman; Royal Free Hospital, London: M Greenberg ; Royal Liverpool Children's Hospital, Liverpool: C Benson, A Riordan; Royal Preston Hospital, Preston: R O'Connor; Salisbury District General Hospital, Salisbury: N Brown; Sheffield Children's Hospital, Sheffield: L Ibberson, F Shackley; Southampton General Hospital, Southampton: SN Faust, J Hancock; St George's Hospital, London: K Doerholt, , K Prime, M Sharland, S Storey; St Luke's Hospital, Bradford: S Gorman; St Mary's Hospital, London: EGH Lyall, C Monrose, P Seery, G Tudor-Williams; St Thomas' Hospital (Evelina Children's Hospital), London: , E Menson; Torbay Hospital, Torquay: J Broomhall, L Hutchinson; University Hospital Lewisham, London: D Scott, J Stroobant; Royal Stoke University Hospital, Stoke On Trent: A Bridgwood, P McMaster; University Hospital of Wales, Cardiff: J Evans, E Blake ; Wexham Park, Slough: A Yannoulis; Whipps Cross Hospital, London: M O'Callaghan. EPPICC/PENTA Co-ordinating Team:



Elizabeth Chappell, Charlotte Duff, Laura Mangiarini, Rebecca Lundin, Alessandra Nardone, Daniel Gomezpena.

**CCASANet:** Fundación Huésped, Argentina, Pedro Cahn; Universidade Federal de Minas Gerais, Brazil, Jorge Pinto; Universidade Federal de São Paulo, Brazil, Regina Célia de Menezes Succi; Les Centres GHESKIO, Haiti, Jean William Pape; Hospital Escuela Universitario, Honduras, Marco Tulio Luque; Instituto Hondureño de Seguridad Social, Honduras, Denis Padgett.

**leDEA Asia-Pacific:** National Centre for HIV/AIDS, Dermatology and STDs, Phnom Penh, Cambodia, PS Ly\*, and V Khol; New Hope for Cambodian Children, Phnom Penh, Cambodia, J Tucker; YRGCARE Medical Centre, CART CRS, Chennai, India, N Kumarasamy\*, S Saghayam, and E Chandrasekaran; Sanglah Hospital, Udayana University, Bali, Indonesia, DK Wati\*, D VedaSwari, and IY Malino; Cipto Mangunkusumo – Faculty of Medicine Universitas Indonesia, Jakarta, Indonesia, N Kurniati\*, and D Muktiarti; Hospital Likas, Kota Kinabalu, Malaysia, SM Fong\*, M Lim, and F Daut; Hospital Raja Perempuan Zainab II, Kelantan, Malaysia, NK Nik Yusoff\*‡, and P Mohamad; Pediatric Institute, Hospital Kuala Lumpur, Kuala Lumpur, Malaysia, KA Razali\*, TJ Mohamed, and MR Drawis; Penang Hospital, Penang, Malaysia, R Nallusamy\*, and KC Chan; Department of Pediatrics, Faculty of Medicine, Chiang Mai University and Research Institute for Health Sciences, Chiang Mai, Thailand, T Sudjaritruk\*, V Sirisanthana, L Aurpibul, and P Oberdorfer; Chiangrai Prachanukroh Hospital, Chiang Rai, Thailand, R Hansudewechakul\*, S Denjanta, S Watanaporn, and A Kongphonoi; Division of Infectious Diseases, Department of Pediatrics, Faculty of Medicine, Khon Kaen University, Khon Kaen, Thailand, P Lumbiganon\*†, P Kosalaraksa, P Tharnprisan, and T Udomphanit; PHPT-IRD UMI 174 (Institut de recherche pour le développement and Chiang Mai University), Chiang Mai, Thailand, G Jourdain; HIV-NAT, The Thai Red Cross AIDS Research Centre, Bangkok, Thailand, T Bunupuradah\*, T Puthanakit, S Anugulruengkitt, and C Phadungphon; Department of Pediatrics, Faculty of Medicine Siriraj Hospital, Mahidol University, Bangkok, Thailand, K Chokephaibulkit\*, K Lapphra, W Phongsamart, and S Sricharoenchai; Children's Hospital 1, Ho Chi Minh City, Vietnam, KH Truong\*, QT Du, and CH Nguyen; Children's Hospital 2, Ho Chi Minh City, Vietnam, VC Do\*, TM Ha, and VT An; National Hospital of Pediatrics, Hanoi, Vietnam, LV Nguyen\*, DTK Khu, AN Pham, and LT Nguyen; Worldwide Orphans Foundation, Ho Chi Minh City, Vietnam, ON Le; TREAT Asia/amfAR -- The Foundation for AIDS Research, Bangkok, Thailand, AH Sohn\*, JL Ross, and C Sethaputra; The Kirby Institute, UNSW Australia, Sydney, Australia, DA Cooper, MG Law\*, and A Kariminia; (\*Steering Committee members; † Current Steering Committee Chair; ‡ co-Chair).

**leDEA Central Africa:** Burundi, Christelle Twizere – Association Nationale de Soutien aux Séropositifs; HIV-clinic (CPAMP-CHUK), Bujumbura University Hospital; Hôpital Prince Régent Charles; Democratic Republic of Congo, Marcel Yotebieng – Bomoï Health Center; Kalembe Lembe Pediatric Hospital; Rwanda, Jean D'amour Sinayobye - Bethsaid Hospital; Busanza Health Center; Gahanga Health Center; Gikondo Health Center; Kabuga Health Center; Kanombe Hospital/Rwanda Military Hospital; Kicukuri Health Center; Masaka Hospital; Nyarugunga Hospital; Women's Equity in Access to Care & Treatment.

**leDEA East Africa:** Academic Model Providing Access to Healthcare, Kenya, Samuel Ayaya; National Institute for Medical Research, Family AIDS Care and Education Services, Kenya, Elizabeth Bukusi; National AIDS Control Program, Tanzania, Geoffrey Somi; Morogoro Regional Hospital, Tanzania, Rita Lyumuya; Tumbi Regional Hospital, Tanzania, Ngonyani Kapella; National Institute for Medical Research, Kisesa Clinic, Tanzania, Mark Urassa; Masaka Regional Referral Hospital, Uganda, Mark Ssali; Rakai Health Science Program, Uganda, Fred Nalugoda. leDEA East Africa also acknowledges senior data manager Beverly Musick, Indiana University, USA.

**leDEA Southern Africa:** Aid for AIDS, South Africa, Gary Maartens; Aurum Institute for Health Research, South Africa, Christopher J. Hoffmann; Centre for Infectious Disease Research in Zambia, Zambia, Michael Vinikoor; Centro de Investigaçao em Saude de Manhiça, Mozambique, Eusebio Maceta; Dignitas, Malawi, Monique van Lettow; Gugulethu Cohort (Desmond Tutu HIV Centre), South Africa, Robin Wood; Harriet Shezi Clinic, Chris Hani Baragwanath Hospital (Wits Paediatric HIV Clinics), South Africa, Shobna Sawry; Hlabisa (Africa Centre for Health & Population Studies), South Africa, Frank Tanser; Khayelitsha ART Programme, South Africa, Andrew Boule; Kheth 'Impilo, South Africa, Geoffrey Fatti; Lighthouse Truse clinic, Malawi, Sam Phiri; McCord Hospital, South Africa, Janet Giddy; Newlands Clinic, Zimbabwe, Cleophas Chimbetete; Queen Elizabeth Hospital, Malawi, Kennedy Malisita; Rahima Moosa Mother & Child Hospital (Wits Paediatric HIV Clinics), South Africa, Karl Technau; Red Cross War Memorial Children's Hospital and School of Child & Adolescent Health, University of Cape Town, South Africa, Brian Eley; SolidarMed SMART Programme Lesotho, Lesotho, Christiane Fritz; SolidarMed SMART Programme Mozambique, Mozambique, Michael Hobbins; SolidarMed SMART Programme Zimbabwe, Zimbabwe, Kamelia Kamenova; Themba Lethu Clinic, Helen Joseph Hospital, South Africa, Matthew P. Fox; Tygerberg Academic Hospital, South Africa, Hans Prozesky.

**leDEA West Africa:** *Executive Committee:* François Dabis (Principal Investigator, Bordeaux, France), Emmanuel Bissagnene (Co-Principal Investigator, Abidjan, Côte d'Ivoire), Elise Arrivé (Bordeaux, France), Patrick Coffie (Abidjan, Côte d'Ivoire), Didier Ekouevi (Abidjan, Côte d'Ivoire), Antoine Jaquet (Bordeaux, France), Valériane Leroy (Chair of the pediatric group, Toulouse, France). Benin, Cotonou: Sikiratou Koumakpaï, (CNHU Hubert Maga). Côte d'Ivoire, Abidjan: Marie-Sylvie N'Gbeche, Kouadio Kouakou (CIRBA); Madeleine Amorissani Folquet (CHU Cocody); Tanoh François Eboua (CHU Yopougon). Ghana, Accra: Lorna Renner (Korle Bu TH). Mali, Bamako: Fatoumata Dicko, Mariam Sylla (CH Gabriel Toure). Togo, Lomé: Elom Takassi (CHU Tokoin/Sylvanus Olympio). Senegal, Dakar: Haby Signate-Sy, Hélène Dior (CH Albert Royer). Burkina Faso, Ouagadougou: Diarra Yé, Fla Kouéta (CH Charles de Gaulle).

**IMPAACT:** The following sites participated in PACTG 219/219C: University of New Jersey Medical and Dental School, Boston Medical Center, Children's Hospital LA, Long Beach Memorial Medical Center, Miller Children's Hospital, Harbor/UCLA Medical Center, Johns Hopkins Hospital & Health System, University of Maryland Medical Center, Texas Children's Hospital, Cook County Hospital, Children's Hospital of Columbus Ohio, University of Miami

Miller School of Medicine, University of California San Francisco School of Medicine, Children's Hospital & Research Center Oakland, University of California San Diego, Duke University School of Medicine, University of North Carolina at Chapel Hill School of Medicine, Schneider Children's Hospital, Harlem Hospital Center, New York University School of Medicine, Children's National Medical Center, University of Washington School of Medicine, University of Illinois College of Medicine at Chicago, Yale University School of Medicine, SUNY at Stony Brook School of Medicine, Howard University Hospital, LA County/University of Southern California Medical Center, University of Florida Health Science Center Jacksonville, North Broward Hospital District, Children's Diagnostic & Treatment Center, University of Rochester Medical Center, Golisano Children's Hospital, Medical College of Virginia, St. Jude Children's Research Hospital, University of Puerto Rico, U. Children's Hospital AIDS, Children's Hospital of Philadelphia, St. Christopher's Hospital for Children/Drexel University College of Medicine, Bronx-Lebanon Hospital Center, New York Medical College/Metropolitan Hospital Center, University of Massachusetts Memorial Children's Medical School, Baystate Medical Center, Connecticut Children's Medical Center, Medical College of Georgia School of Medicine, University of South Alabama College of Medicine, LSU Health Sciences Center, Tulane University Health Sciences Center, St. Josephs Hospital and Medical Center, Cooper University Hospital, Children's Hospital Boston, David Geffen School of Medicine at UCLA, Children's Hospital of Orange County, Children's Memorial Hospital University of Chicago, Mt. Sinai Hospital Medical Center Chicago, Columbia University Medical Center, Incarnation Children's Center, Cornell University, Bellevue Hospital, San Francisco General, Phoenix Children's Hospital, Metropolitan Hospital Center New York, University of Cincinnati, SUNY Downstate Medical Center, Children's Hospital at Downstate, North Shore University Hospital, University of South Florida, Cornell University, Oregon Health & Science University, Children's Hospital of the King's Daughters, Lincoln Medical & Mental Health Center, Mt. Sinai School of Medicine, Emory University Hospital, San Juan City Hospital, UMDNJ - Robert Wood Johnson, Ramon Ruiz Arnau University Hospital, Medical University of South Carolina, SUNY Upstate Medical University, Wayne State University School of Medicine, Children's Hospital of Michigan, Children's Hospital at Albany Medical Center, Children's Medical Center of Dallas, University of Colorado at Denver and Health Sciences, Columbus Children's Hospital, University of Florida College of Medicine, University of Mississippi Medical Center, Palm Beach County Health Department, Children's Hospital LA, Vanderbilt University Medical Center, Washington University School of Medicine at St. Louis, St. Louis Children's Hospital, Children's Hospital & Medical Center Seattle, St. Luke's-Roosevelt Hospital Center, Montefiore Medical Center/Albert Einstein College of Medicine, Children's Hospital Washington DC, Children's Hospital of the King's Daughters, University of Alabama at Birmingham, Columbus Regional HealthCare System, The Medical Center, Sacred Heart Children's Hospital/CMS of Florida, Bronx Municipal Hospital Center/Jacobi Medical Center.

The following sites participated in P1074: New Jersey Medical School, UCLA–Los Angeles/Brazil AIDS Consortium, Texas Children's Hospital, Lurie Children's Hospital of Chicago, Columbia University Medical Center, University of Miami Pediatric Perinatal HIV/AIDS, University of California San Diego, Mother-Child-Adolescent Program, Duke University Medical Center, Children's Hospital of Boston, Boston Medical Center Pediatric HIV Program, New York University, Jacobi Medical Center Bronx, Children's National Medical Center Washington, DC,

CIPHER Incidence of switch to second-line ART Supplementary Tables and Figures (Lancet HIV)

Seattle Children's Hospital, University of South Florida Tampa, San Juan City Hospital, SUNY Stony Brook, Children's Hospital of Michigan, Howard University Washington DC, Harbor UCLA Medical Center, University of Southern California School of Medicine, University of Florida Health Science Center, University of Colorado Denver, South Florida Children's Diagnostic and Treatment Center Fort Lauderdale, Strong Memorial Hospital University of Rochester Medical Center, Rush University Cook County Hospital Chicago, Children's Hospital of Los Angeles, University of California San Francisco, Johns Hopkins University Baltimore, Miller Children's Hospital, University of Maryland Baltimore, Tulane University New Orleans, University of Alabama Birmingham, The Children's Hospital of Philadelphia, Bronx-Lebanon Hospital, St Jude's Children's Hospital, University of Puerto Rico Pediatric HIV/AIDS Research Program, Western New England Maternal Pediatric Adolescent AIDS.

**Médecins Sans Frontières:** The following sites contributed to the MSF Pediatric Cohorts : *Cameroon* – Douala Nylon, Douala Soboum; *Central African Republic* – Boguila, Carnot, Zemio; *Democratic Republic of Congo* – Bukavu Baraka, Katanga Dubie, Katanga Kilwa, Kimbi Lulenge, Kinshasa, Mweso, Shamwana; *Ethiopia* – Abdurafi; *India* – Manipur, Moreh, Mumbai; *Malawi* – Chiradzulu; *Mozambique* – Alto Mae, Chamanculo; *Myanmar* – Dawei, Insein, Kachin Bhamo, Kachin Moegaung, Kachin Myitkyina 1, Kachin Myitkyina 1, Kachin Phakant, Kachin Waimaw, Rakhine Maugdaw, Rachine Sittwe, Shan Laiza, Shan Lashio, Shan Muse, Yangon B, Yangon C, Yangon I, Yangon T, Yangon TIB, Yangon TIC; *South Sudan* – Leer, Nasir; *Guinea* – Conakry; *Uganda* – Arua.

**PHACS:** The following sites participated in PHACS AMP: Ann & Robert H. Lurie Children's Hospital of Chicago: Ram Yogev; Baylor College of Medicine: William Shearer; Bronx Lebanon Hospital Center: Murli Purswani; Children's Diagnostic & Treatment Center: Ana Puga; Children's Hospital, Boston: Sandra K. Burchett; Jacobi Medical Center: Andrew Wiznia; Rutgers - New Jersey Medical School: Arry Dieudonne; St. Christopher's Hospital for Children: Janet S. Chen; St. Jude Children's Research Hospital: Katherine Knapp; San Juan Hospital/Department of Pediatrics: Midnela Acevedo-Flores; Tulane University School of Medicine: Margarita Silio; University of California, San Diego: Stephen A. Spector; University of Colorado Denver Health Sciences Center: Elizabeth McFarland; University of Miami: Gwendolyn Scott. Project coordination was provided by Harvard T.H. Chan School of Public Health: Julie Alperen and by Tulane University School of Medicine: Patrick Davis. Data management was provided by Frontier Science and Technology Research Foundation: Sue Siminski; Operational and regulatory support was provided by Westat Inc: Julie Davidson.

**Optimal Models-ICAP:** The following people and sites contributed to Optimal Models: *Ethiopia* -Mohamed Ahmed, Harari Regional Health Bureau; Zelalem Habtamu, Oromia Regional Health Bureau; Kassahun Hailegiorgis, Dire Dawa Regional Health Bureau; Zenebe Melaku, ICAP Ethiopia. Abomsa Hospital, Abosto HC, Adama Hospital, Addis Ketema Health Center, Adola, Ambo Hospital, Arategna Health Center, Assela Hospital, Bishoftu Hospital, Bisidimo Hospital, Bulle Hura Hospital, Chiro Hospital, Deder Hospital, Dire Dawa Health Center, Dodola, Fitcha Hospital, Gedo Hospital, Gelemso Hospital, Gende Gerada Health Center, Gende Kore Health Center, Gindeberet Hospital, Ginir Hospital, Goro Health Center, Harar TB Hospital, Hiwot Fana

Hospital, Jenila Health Center, Jijiga Health Center, Jimma Hospital, Karamara Hospital, Kuyu Hospital, Leghare Health Center, Limmu-Genet Hospital, Mariam Work Hospital, Melka-Jebdu Health Center, Metehara Hospital, Metu Karl Hospital, Misrak Arbegnoch Hospital, Negele Hospital, Robe Dida, Sabian Health Center, Shashemene Hospital, Sher Ethiopia Private Hospital, St. Luke (Wolisso) Hospital, Tulu Bolo Hospital, Wonji Hospital, Yabelo, Yimaji Private Hospital. *Kenya* - Mark Hawken, ICAP Kenya; Maureen Kamene Kimenye, PASCO Central province; Irene N. Mukui, National AIDS and STIs Control Programme. Abidha Health Center, Ahero Sub District Hospital, Akala Health Center, Aluor Mission, Athi River Health Center, Awasi Mission, Bar Agulu Dispensary, Bar Olengo, Bondo District Hospital, Boro Dispensary, Daniel Comboni Dispensary-Ndithini, Dienya Health Center, Gobei Dispensary, Hawinga Dispensary, Kali Dispensary, Kathiani Sub District Hospital, Kibwezi Health Center, Kikoko Mission Hospital, Kitui District hospital, Madiant District Hospital, Mahaya Health Center, Malanga Health Center, Manyuanda Dispensary, Masogo Subdistrict Hospital, Matangwe mission Hospital, Mtito Andei Health Center, Muhoroni SDH, Mulaha Dispensary, Naya Dispensary, Ndere Health Center, Ndori Dispensary, Ngiya Mission, Nyakach AIC Dispensary, Nyangoma Kogelo, Ongiello Health Center, Rangala Mission, Rera Health Center, Siaya District Hospital, Sigomere Health Center, Sikalame Health Center, Tawa Health Center, Tingwangi Health Center, Ukwala Health Center, Usigu Health Center, Uyawi Health Center, Wagai Dispensary, Yala Sub District Hospital. *Mozambique* - Josue Lima, ICAP Mozambique; Antonio Mussa, ICAP Mozambique; Américo Rafi Assan, Ministry of Health Mozambique. 17 de Setembro Health Center, 25 de Setembro Health Center – Nampula, Akumi Health Center – Nacala, Anchilo Health Center, Angoche HR, Coalane Health Center, Gurue Rural Hospital Ilha de Mocambique, Liupo Health Center, Lumbo Health Center, Malema Health Center, Marrere General Hospital, Meconta Health Center, Memba Health Center, Milange Health Center, Military Hospital-Maputo, Mocuba Rural Hospital, Moma Health Center, Monapo HR, Monapo Health Center, Mossuril HR, Nacala-Porto District Hospital, Nacala-Porto Health Center, Nacuxa HR, Nametil Health Center, Namialo Health Center, Namitoria Health Center, Nampula Central Hospital, Namuinho Health Center, Nicoadala Health Center, Pediatric Central Hospital – Nampula, Ribaue Rural Hospital; *Rwanda* - Vincent Mutabazi, Treatment and Research AIDS Center; Ruben Sahabo, ICAP Rwanda. Avega Clinic, Bethsaida Health Center, Bigogwe Health Center, Busasamana Health Center, Butare Hospital, Carrefour Polyclinic, Central Hospital-Kigali, Congo Nil Health Center, Gisenyi District Hospital, Gisenyi Prison, Gisovu Health Center, Kabaya District Hospital, Kabusunzu Health Center, Kayove Health Center, Kibuye District Hospital, Kicukiro Health Center, Kigali Central Prison, Kigufi Health Center, Kinunu Health Center, Kirambo Health Center, Kirinda District Hospital, Kivumu Health Center, Mugonero District Hospital, Muhima District Hospital, Muhororo District Hospital, Mukungu Health Center, Munzanga Health Center, Murunda District Hospital, Mushubati Health Center, Mwendo Health Center, Ndera Neuropsychiatric Hospital, Nyabirasi Health Center, Nyakiriba Health Center, Nyange A health Center, Nyange B Health Center, Ramba Health Center, Rambura Health Center, Rubengera Health Center, Rugarama Health Center, Rususa health Center, Shyira District Hospital; *Tanzania* - Gretchen Antelman, ICAP Tanzania; Redempta Mbatia, ICAP Tanzania; Geoffrey Somi, National AIDS Control Program. Al-Rahma Hospital, Bagamoyo District Hospital, Baleni Dispensary, Biharamulo Designated District Hospital, Bunazi Health Center, Bwanga Health Center, Chake Chake Hospital, Chalinze Health Center, Chato District

Hospital, ChemChem (Miburani) Dispensary, Heri Mission Hospital, Ikwiriri Health Center, Isingiro Hospital, Izimbya Hospital, Kabanga Mission Hospital, Kagera Sugar Hospital, Kagondo Hospital, Kahororo Dispensary, Kaigara Health Center, Kakonko Health Center, Kanazi Health Centre, Kasulu District Hospital, Katoro Health Centre, Kayanga Health Centre, Kibiti Health Center, Kibondo District Hospital, Kigarama Health Centre, Kigoma Dispensary, Kigoma Regional Hospital, Kilimahewa Mission Dispensary, Kirongwe Dispensary, Kisarawe District Hospital, Kishanje Health Centre, Kisiju Health Centre, Kivunge Hospital, Kongowe Dispensary, Lugoba Health Center, Mabamba Health Center, Mafia District Hospital, Maneromango Health Center, Masaki Health Centre, Mchukwi Hospital, Michiweni Hospital, Miono Health Centre, Mkamba Health Centre, Mkoani Health Centre, Mkomaindo Hospital, Mkuranga District Hospital, Mlandizi Health Center, Mnazi Mmoja Hospital, Mugana Designated District Hospital, Murgwanza Designated District Hospital, Murongo Health Center, Mwembeladu Maternity Hospital, Mzenga Health Centre, Ndanda Hospital, Ndolage Hospital, Newala Hospital, Nguruka Health Centre, Nkwenda Health Center, Nyakahanga Designated District Hospital, Nyamiaga Health Centre, Ocean Road Cancer Institute, Rubya Designated District Hospital, Rulenge Hospital, Rwamishenye Health Centre, St. Therese Bukoba Health Center, Tumbi Regional Hospital, Ujiji Health Center, Utende Dispensary, Utete District Hospital, Uvinza Dispensary, Wete Hospital, Zam Zam Health Centre. *ICAP Central* - Matthew Lamb, Denis Nash, Harriet Nuwagaba-Biribonwoha.

**Table S1. Cumulative incidence (%) of switch to second-line ART by 1, 2, and 3 years after start of ART: by initial regimen and region**

| % switched to second-line                                    | USA               | Latin America   | Europe            | Asia           | Southern Africa | Rest of sub-Saharan Africa | Total          |
|--------------------------------------------------------------|-------------------|-----------------|-------------------|----------------|-----------------|----------------------------|----------------|
| <b>Overall:</b>                                              |                   |                 |                   |                |                 |                            |                |
| 1 year                                                       | 9.9 (6.2, 14.7)   | 1.1 (0.6, 1.9)  | 4.8 (3.9, 5.8)    | 0.6 (0.5, 0.9) | 0.9 (0.7, 1.0)  | 0.3 (0.3, 0.3)             | 0.6 (0.5, 0.6) |
| 2 years                                                      | 19.0 (13.8, 24.9) | 3.1 (2.1, 4.4)  | 9.5 (8.2, 10.8)   | 3.2 (2.8, 3.7) | 3.1 (2.8, 3.7)  | 0.8 (0.7, 0.8)             | 1.7 (1.6, 1.8) |
| 3 years                                                      | 26.1 (20.0, 32.7) | 6.5 (4.9, 8.3)  | 12.2 (10.8, 13.7) | 6.6 (5.9, 7.3) | 5.4 (5.1, 5.9)  | 1.5 (1.4, 1.6)             | 3.1 (3.0, 3.2) |
| <b>NNRTI-based ART:</b>                                      |                   |                 |                   |                |                 |                            |                |
| 1 year                                                       | 15.9 (9.9, 23.2)  | 1.2 (0.6, 2.2)  | 6.7 (5.3, 8.2)    | 0.6 (0.4, 0.8) | 1.0 (0.8, 1.2)  | 0.3 (0.2, 0.3)             | 0.5 (0.5, 0.6) |
| 2 years                                                      | 28.5 (20.5, 37.0) | 3.3 (2.2, 4.7)  | 12.5 (10.7, 14.5) | 3.3 (2.8, 3.8) | 4.0 (3.6, 4.4)  | 0.7 (0.6, 0.8)             | 1.6 (1.5, 1.7) |
| 3 years                                                      | 37.0 (28.1, 45.9) | 6.6 (5.0, 8.5)  | 16.1 (14.0, 18.4) | 6.6 (5.9, 7.4) | 7.0 (6.4, 7.6)  | 1.4 (1.3, 1.5)             | 3.0 (2.9, 3.2) |
| <b>PI-based ART:</b>                                         |                   |                 |                   |                |                 |                            |                |
| 1 year                                                       | 1.3 (0.1, 6.2)    | -               | 2.4 (1.6, 3.6)    | 1.7 (0.6, 4.0) | 0.7 (0.5, 0.9)  | 2.0 (1.3, 2.9)             | 1.0 (0.9, 1.3) |
| 2 years                                                      | 0.5 (0.2, 11.8)   | 1.1 (0.9, 5.4)  | 5.4 (4.1, 7.1)    | 2.2 (0.8, 4.8) | 1.8 (1.5, 2.1)  | 3.8 (2.8, 5.1)             | 2.5 (2.1, 2.8) |
| 3 years                                                      | 10.1 (4.4, 18.5)  | 5.1 (1.6, 11.6) | 7.0 (5.4, 8.8)    | 3.6 (1.6, 7.1) | 3.2 (2.7, 3.7)  | 4.3 (3.2, 5.7)             | 3.9 (3.4, 4.3) |
| <b>NNRTI-based ART, routine CD4/VL monitoring:</b>           | -                 | -               | -                 | -              | -               |                            |                |
| 1 year                                                       |                   |                 |                   |                |                 | 1.2 (0.8, 1.9)             |                |
| 2 years                                                      |                   |                 |                   |                |                 | 3.4 (2.6, 4.4)             |                |
| 3 years                                                      |                   |                 |                   |                |                 | 5.9 (4.7, 7.2)             |                |
| <b>NNRTI-based ART, routine CD4, targeted VL monitoring:</b> | -                 | -               | -                 | -              | -               |                            |                |
| 1 year                                                       |                   |                 |                   |                |                 | 0.3 (0.3, 0.5)             |                |
| 2 years                                                      |                   |                 |                   |                |                 | 1.0 (0.8, 1.1)             |                |
| 3 years                                                      |                   |                 |                   |                |                 | 2.1 (1.8, 2.4)             |                |
| <b>NNRTI-based ART, routine CD4 monitoring only:</b>         | -                 | -               | -                 | -              | -               |                            |                |
| 1 year                                                       |                   |                 |                   |                |                 | 0.2 (0.2, 0.5)             |                |
| 2 years                                                      |                   |                 |                   |                |                 | 0.5 (0.4, 0.6)             |                |
| 3 years                                                      |                   |                 |                   |                |                 | 1.1 (0.9, 1.2)             |                |
| <b>NNRTI-based ART, clinical monitoring only:</b>            | -                 | -               | -                 | -              | -               |                            |                |

|                                                 |   |   |   |   |   |                 |  |
|-------------------------------------------------|---|---|---|---|---|-----------------|--|
| 1 year                                          |   |   |   |   |   | 0.2 (0.1, 0.3)  |  |
| 2 years                                         |   |   |   |   |   | 0.3 (0.2, 0.5)  |  |
| 3 years                                         |   |   |   |   |   | 0.7 (0.6, 1.0)  |  |
| <b>PI-based ART, routine CD4/VL monitoring:</b> | - | - | - | - | - |                 |  |
| 1 year                                          |   |   |   |   |   | 2.5 (0.7, 6.7)  |  |
| 2 years                                         |   |   |   |   |   | 9.7 (4.4, 17.5) |  |
| 3 years                                         |   |   |   |   |   | 9.7 (4.4, 17.5) |  |
| <b>PI-based ART, other monitoring strategy:</b> | - | - | - | - | - |                 |  |
| 1 year                                          |   |   |   |   |   | 1.9 (1.3, 2.8)  |  |
| 2 years                                         |   |   |   |   |   | 3.4 (2.4, 4.6)  |  |
| 3 years                                         |   |   |   |   |   | 3.8 (2.7, 5.2)  |  |

ART=antiretroviral therapy; PI=protease inhibitor; NNRTI=non-nucleoside reverse transcriptase inhibitor; VL=viral load.

**Table S2. Cumulative incidence (%) of switch to second-line ART by 1, 2, and 3 years after start of ART among patients who initiated ART in 2011-2014: by monitoring strategy**

| Year after ART start                                       | Percent (95% CI) switched to second-line |                |                |
|------------------------------------------------------------|------------------------------------------|----------------|----------------|
|                                                            | 1 year                                   | 2 years        | 3 years        |
| <b>Monitoring strategy, among those starting ART ≥2011</b> |                                          |                |                |
| Routine VL, routine CD4                                    | 0.9 (0.7, 1.3)                           | 2.8 (2.2, 3.5) | 4.1 (3.3, 5.2) |
| Targeted VL, routine CD4                                   | 0.4 (0.2, 0.6)                           | 0.9 (0.6, 1.3) | 1.6 (1.1, 2.2) |
| Routine CD4 only                                           | 0.3 (0.2, 0.4)                           | 0.6 (0.4, 0.8) | 1.2 (0.8, 1.6) |
| Clinical monitoring                                        | 0.3 (0.1, 0.5)                           | 0.3 (0.2, 0.6) | 0.8 (0.4, 1.5) |
| <b>Total</b>                                               | 0.4 (0.3, 0.5)                           | 1.0 (0.9, 1.2) | 1.8 (1.5, 2.2) |



**Table S3: Sensitivity analyses with alternative definition of switch (without requirement for change in  $\geq$ NRTI)**

|                                        | Global p-value<br>sHR (95% CI) |                   |                                                                                                        |                   |
|----------------------------------------|--------------------------------|-------------------|--------------------------------------------------------------------------------------------------------|-------------------|
|                                        | Complete case (n=93,351)       |                   | Sub-group of cohorts with routine CD4 monitoring and children with immune/WAZ ascertainment (n=32,989) |                   |
|                                        | Univariate                     | Multivariate      | Univariate                                                                                             | Multivariate      |
| <b>Characteristics at start of ART</b> |                                |                   |                                                                                                        |                   |
| <b>Sex</b>                             | P<0.0001                       | P<0.0001          | P<0.0001                                                                                               | P<0.0001          |
| Female vs male                         | 0.80 (0.75, 0.85)              | 0.79 (0.74, 0.84) | 0.81 (0.76, 0.87)                                                                                      | 0.82 (0.76, 0.89) |
| <b>Age (years)</b>                     | p<0.0001                       | p<0.0001          | p<0.0001                                                                                               | p<0.0001          |
| <3                                     | 0.62 (0.57, 0.67)              | 0.64 (0.59, 0.69) | 0.59 (0.55, 0.64)                                                                                      | 0.63 (0.57, 0.71) |
| 3-5                                    | 0.77 (0.71, 0.84)              | 0.72 (0.67, 0.78) | 0.78 (0.71, 0.84)                                                                                      | 0.71 (0.64, 0.79) |
| 6-9                                    | 1.00                           | 1.00              | 1.00                                                                                                   | 1.00              |
| $\geq$ 10                              | 1.29 (1.11, 1.50)              | 1.14 (0.97, 1.33) | 1.16 (1.00, 1.36)                                                                                      | 1.25 (1.04, 1.50) |
| <b>Known AIDS diagnosis</b>            | p=0.028                        | p=0.029           | p=0.60                                                                                                 | p=0.64            |
| Yes vs no                              | 0.93 (0.88, 0.99)              | 0.93 (0.87, 0.99) | 1.02 (0.95, 1.09)                                                                                      | 0.98 (0.90, 1.07) |
| <b>WHO immunodeficiency for age</b>    |                                |                   | p<0.0001                                                                                               | p<0.0001          |
| None                                   |                                |                   | 1.08 (0.91, 1.28)                                                                                      | 0.92 (0.77, 1.11) |
| Mild                                   |                                |                   | 1.24 (1.03, 1.49)                                                                                      | 1.19 (0.97, 1.45) |
| Advanced                               |                                |                   | 1.00                                                                                                   | 1.00              |
| Severe                                 |                                |                   | 1.38 (1.22, 1.57)                                                                                      | 1.41 (1.22, 1.63) |
| <b>Weight for age z-score</b>          |                                |                   | p=0.16                                                                                                 | p=0.26            |
| <-2                                    |                                |                   | 0.93 (0.86, 1.01)                                                                                      | 1.06 (0.97, 1.16) |
| -2 to <0                               |                                |                   | 1.00                                                                                                   | 1.00              |
| $\geq$ 0                               |                                |                   | 1.02 (0.89, 1.18)                                                                                      | 0.94 (0.81, 1.10) |
| <b>Regimen</b>                         | p=0.0017                       | p<0.0001          | p<0.0001                                                                                               | p<0.0001          |
| PI vs NNRTI                            | 1.15 (1.05, 1.26)              | 0.70 (0.63, 0.78) | 0.69 (0.62, 0.76)                                                                                      | 0.58 (0.50, 0.68) |
| <b>Calendar year</b>                   | p<0.0001                       | p<0.0001          | p<0.0001                                                                                               | p<0.0001          |
| $\leq$ 2004                            | 2.98 (2.72, 3.25)              | 1.33 (1.21, 1.47) | 2.30 (2.10, 2.52)                                                                                      | 1.35 (1.18, 1.53) |
| 2005-2007                              | 1.45 (1.35, 1.56)              | 1.25 (1.16, 1.35) | 1.27 (1.17, 1.37)                                                                                      | 1.18 (1.07, 1.30) |
| 2008-2010                              | 1.00                           | 1.00              | 1.00                                                                                                   | 1.00              |
| $\geq$ 2011                            | 0.54 (0.47, 0.62)              | 0.61 (0.53, 0.70) | 0.48 (0.41, 0.57)                                                                                      | 0.59 (0.48, 0.72) |

CI, 95% confidence interval; sHR, standardized hazard ratio; ART, antiretroviral therapy; WAZ, weight-for-age z-score. See also Supplementary Tables S1 and S2 and Figures 1 and 2 (Lancet HIV).

| <b>Cohort level factors</b> |                   |                   |                   |                   |
|-----------------------------|-------------------|-------------------|-------------------|-------------------|
| <b>Monitoring strategy</b>  | p<0.0001          | p<0.0001          | p<0.0001          | p<0.0001          |
| Routine CD4 & VL            | 4.79 (4.38, 5.23) | 2.69 (2.25, 3.21) | 2.95 (2.67, 3.25) | 2.33 (1.91, 2.84) |
| Routine CD4 & targeted VL   | 2.16 (1.94, 2.40) | 1.94 (1.74, 2.17) | 1.27 (1.13, 1.43) | 1.42 (1.23, 1.64) |
| Routine CD4 only            | 1.00              | 1.00              | 1.00              | 1.00              |
| Clinical only               | 0.74 (0.61, 0.89) | 0.67 (0.55, 0.82) | -                 | -                 |
| <b>Country income group</b> | p<0.0001          | p<0.0001          | p<0.0001          | P=0.70            |
| Low                         | 1.00              | 1.00              | 1.00              | 1.00              |
| Lower middle                | 1.02 (0.93, 1.12) | 1.08 (0.97, 1.20) | 0.99 (0.89, 1.11) | 1.00 (0.87, 1.14) |
| High/upper middle           | 3.38 (3.13, 3.64) | 1.57 (1.35, 1.84) | 2.39 (2.20, 2.59) | 1.09 (0.89, 1.33) |
| <b>Region</b>               | p<0.0001          | p<0.0001          | p<0.0001          | p<0.0001          |
| USA                         | 4.15 (3.19, 5.39) | 4.05 (3.09, 5.32) | 3.05 (1.87, 4.97) | 4.40 (2.30, 8.40) |
| Europe                      | 2.46 (2.22, 2.74) | 2.41 (2.15, 2.70) | 2.18 (1.96, 2.44) | 2.46 (2.09, 2.91) |
| Latin America               | 1.36 (1.14, 1.63) | 2.14 (1.74, 2.62) | 1.43 (1.19, 1.73) | 2.35 (1.85, 2.99) |
| Asia                        | 1.47 (1.34, 1.61) | 1.70 (1.53, 1.90) | 1.38 (1.25, 1.52) | 1.11 (0.96, 1.28) |
| Southern Africa             | 1.00              | 1.00              | 1.00              | 1.00              |
| Rest of SSA                 | 0.35 (0.32, 0.38) | 1.05 (0.88, 1.26) | 0.47 (0.43, 0.51) | 0.81 (0.65, 1.02) |

ART=antiretroviral therapy; sHR=Sub-distribution hazard ratio; CI=confidence interval; PI=protease inhibitor; NNRTI=non-nucleoside reverse transcriptase inhibitor; NRTI= nucleoside reverse transcriptase inhibitor; WAZ=weight-for-age z-score; VL=viral load; SSA=sub-Saharan Africa.

**Table S4. Characteristics at time of switch among children switched to second-line ART**

|                                                    | USA            | Latin America    | Europe          | Asia            | Southern Africa | Rest of sub-Saharan Africa | Total           |
|----------------------------------------------------|----------------|------------------|-----------------|-----------------|-----------------|----------------------------|-----------------|
| N                                                  | <b>72</b>      | <b>123</b>       | <b>464</b>      | <b>587</b>      | <b>1255</b>     | <b>1382</b>                | <b>3883</b>     |
| Median time from ART start to switch, months [IQR] | 24 [12, 42]    | 42 [26, 72]      | 35 [14, 66]     | 35 [22, 52]     | 33 [19, 55]     | 38 [23, 57]                | 35 [20, 57]     |
| Male sex                                           | 33 (45.8)      | 61 (49.6)        | 223 (48.1)      | 359 (61.2)      | 702 (55.9)      | 816 (59.1)                 | 2194 (56.5)     |
| Median age, years [IQR]                            | 4.1 [1.9, 7.5] | 10.3 [6.7, 13.8] | 8.2 [4.2, 12.0] | 7.7 [5.5, 10.0] | 8.3 [5.3, 11.2] | 9.4 [6.3, 12.0]            | 8.6 [5.5, 11.5] |
| <b>Drug class of switch</b>                        |                |                  |                 |                 |                 |                            |                 |
| NNRTI to PI                                        | 56 (77.8)      | 117 (95.1)       | 330 (71.1)      | 573 (97.6)      | 940 (74.9)      | 1313 (95.0)                | 3329 (85.7)     |
| PI to NNRTI                                        | 8 (11.1)       | 4 (3.3)          | 78 (16.8)       | 5 (0.1)         | 277 (22.1)      | 47 (3.4)                   | 419 (10.8)      |
| Other                                              | 8 (11.1)       | 2 (1.6)          | 56 (12.1)       | 9 (1.5)         | 38 (3.0)        | 22 (1.6)                   | 135 (3.5)       |
| <b>WHO immunodeficiency for age</b>                |                |                  |                 |                 |                 |                            |                 |
| N with measurement available                       | 56 (77.8*)     | 106 (86.2*)      | 394 (84.9*)     | 525 (89.4*)     | 984 (78.4*)     | 951 (68.8*)                | 3016 (77.7*)    |
| None                                               | 25 (44.6)      | 31 (29.3)        | 183 (46.5)      | 129 (24.6)      | 496 (50.4)      | 174 (18.3)                 | 1038 (34.4)     |
| Mild                                               | 18 (32.1)      | 9 (8.5)          | 55 (14.0)       | 58 (11.1)       | 137 (13.9)      | 77 (8.1)                   | 354 (11.7)      |
| Advanced                                           | 6 (10.7)       | 8 (7.6)          | 50 (12.7)       | 68 (13.0)       | 95 (9.7)        | 132 (13.9)                 | 359 (11.9)      |
| Severe                                             | 7 (12.5)       | 58 (54.7)        | 106 (26.9)      | 270 (51.4)      | 256 (26.0)      | 568 (59.7)                 | 1265 (41.9)     |
| <b>Viral load</b>                                  |                |                  |                 |                 |                 |                            |                 |
| N with measurement available                       | 53 (73.6*)     | 56 (45.5*)       | 414 (89.2*)     | 433 (73.8*)     | 1034 (82.4*)    | 429 (31.0*)                | 2419 (62.3*)    |
| ≤1000 copies/mL                                    | 9 (17.0)       | 9 (16.1)         | 124 (30.0)      | 28 (6.5)        | 226 (21.9)      | 10 (2.3)                   | 406 (16.8)      |
| >1000 copies/mL                                    | 44 (83.0)      | 47 (83.9)        | 290 (70.1)      | 405 (93.5)      | 808 (78.1)      | 419 (97.7)                 | 2013 (83.2)     |
| Tuberculosis diagnosis                             | 0 (0.0)        | 0 (0.0)          | 1 (0.2)         | 38 (6.5)        | 49 (3.9)        | 115 (8.3)                  | 203 (5%)        |

NOTE. Data are no. (%) of patients, unless otherwise indicated. IQR: interquartile range; ART=antiretroviral therapy; PI=protease inhibitor; NNRTI=non-nucleoside reverse transcriptase inhibitor; NRTI= nucleoside reverse transcriptase inhibitor; WAZ=weight-for-age z-score; VL=viral load

Figure S1. Flowchart of children included in the analysis

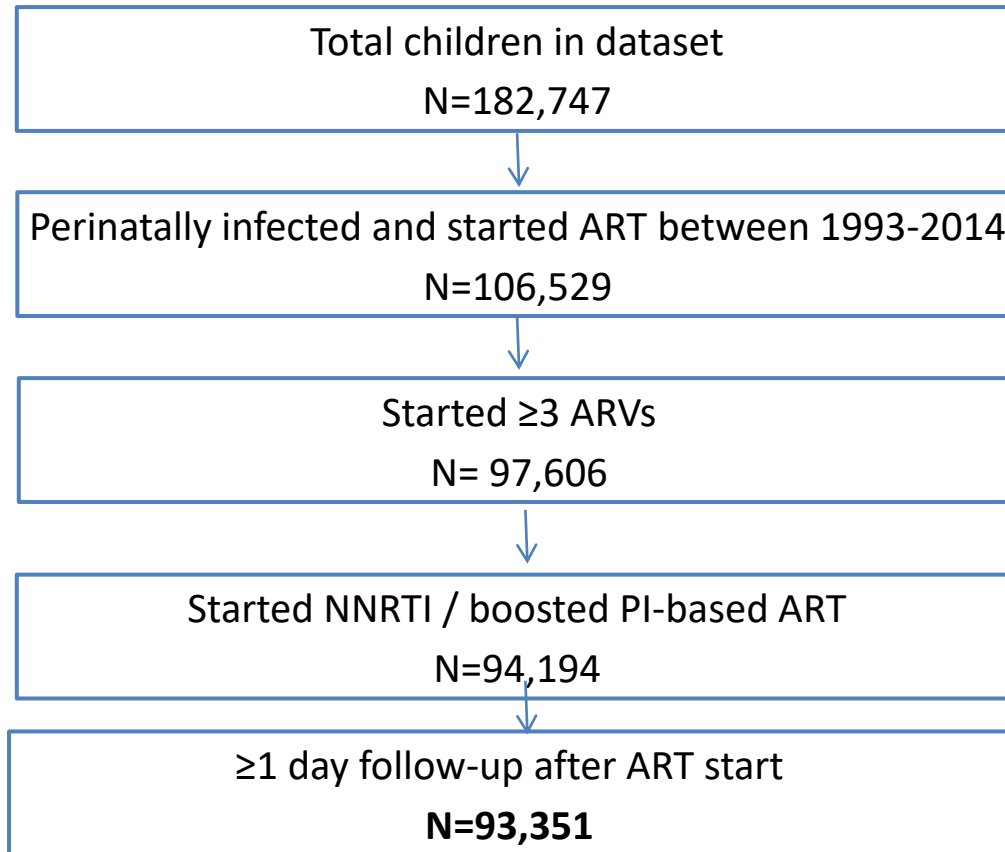

ART: antiretroviral therapy; ARVs=antiretroviral drugs; NNRTI=non-nucleoside reverse transcriptase inhibitor; PI=protease inhibitor.

Figure S2. Drug class used in first-line ART regimen, by region

(a) Amongst all children initiating ART

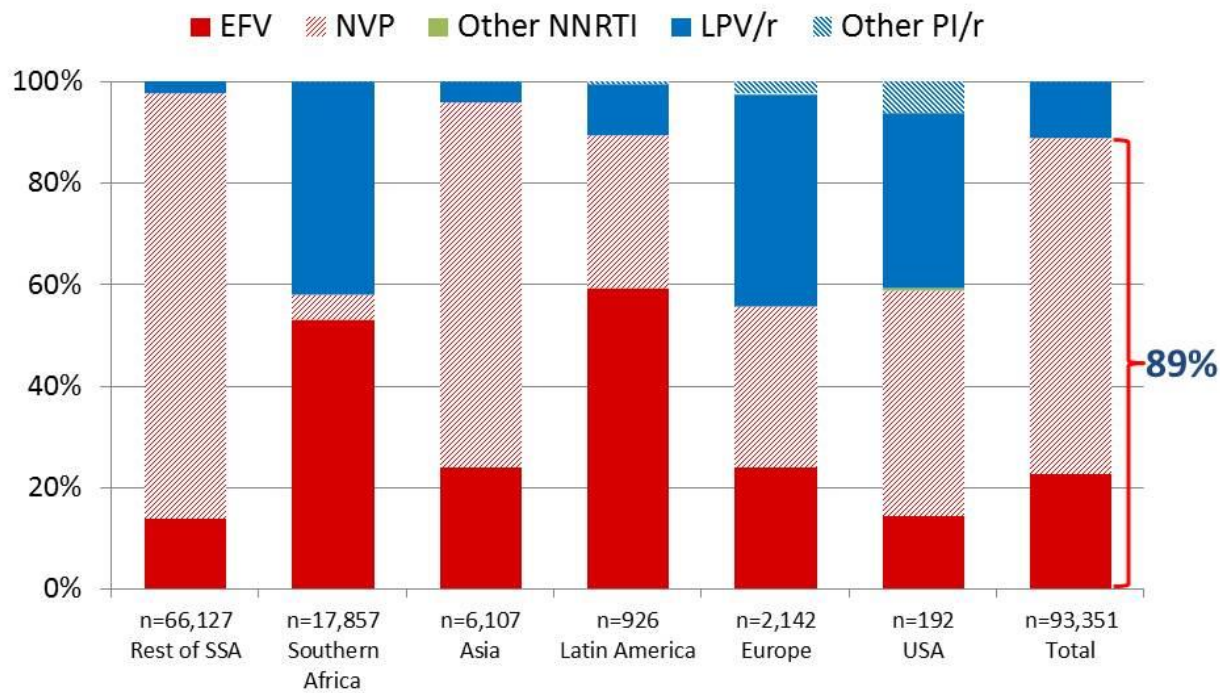

(b) Amongst children aged <3 years at ART initiation

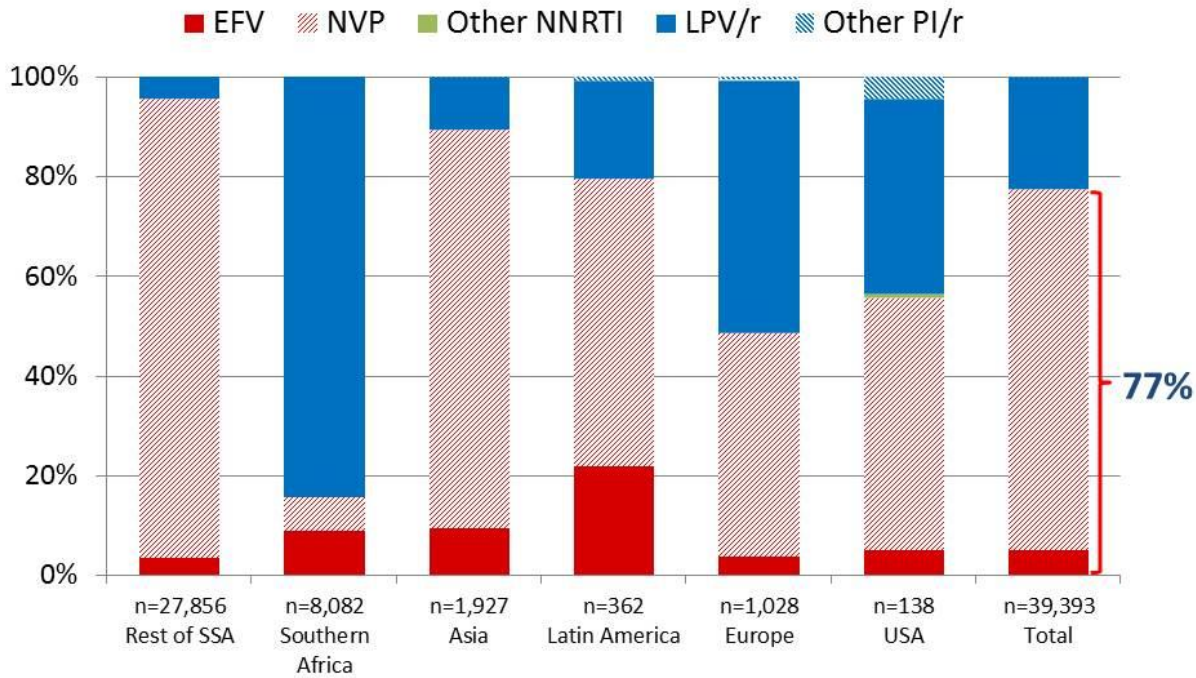

ART: antiretroviral therapy; NNRTI=non-nucleoside reverse transcriptase inhibitor; PI=protease inhibitor; NVP=nevirapine; EFV=efavirenz; LPV=lopinavir; SSA=sub-Saharan Africa.
